# Supplementary material for: Protein kinase D1/2 is involved in the maturation of multivesicular bodies and secretion of exosomes in T and B lymphocytes
Source: Springer Nature journal article supplement (doi:10.1038/cdd.2015.72), 2015-06-05
Supplement: 41418_2016_BFcdd201572_MOESM33_ESM.pdf [file 41418_2016_BFcdd201572_MOESM33_ESM.pdf]

**A**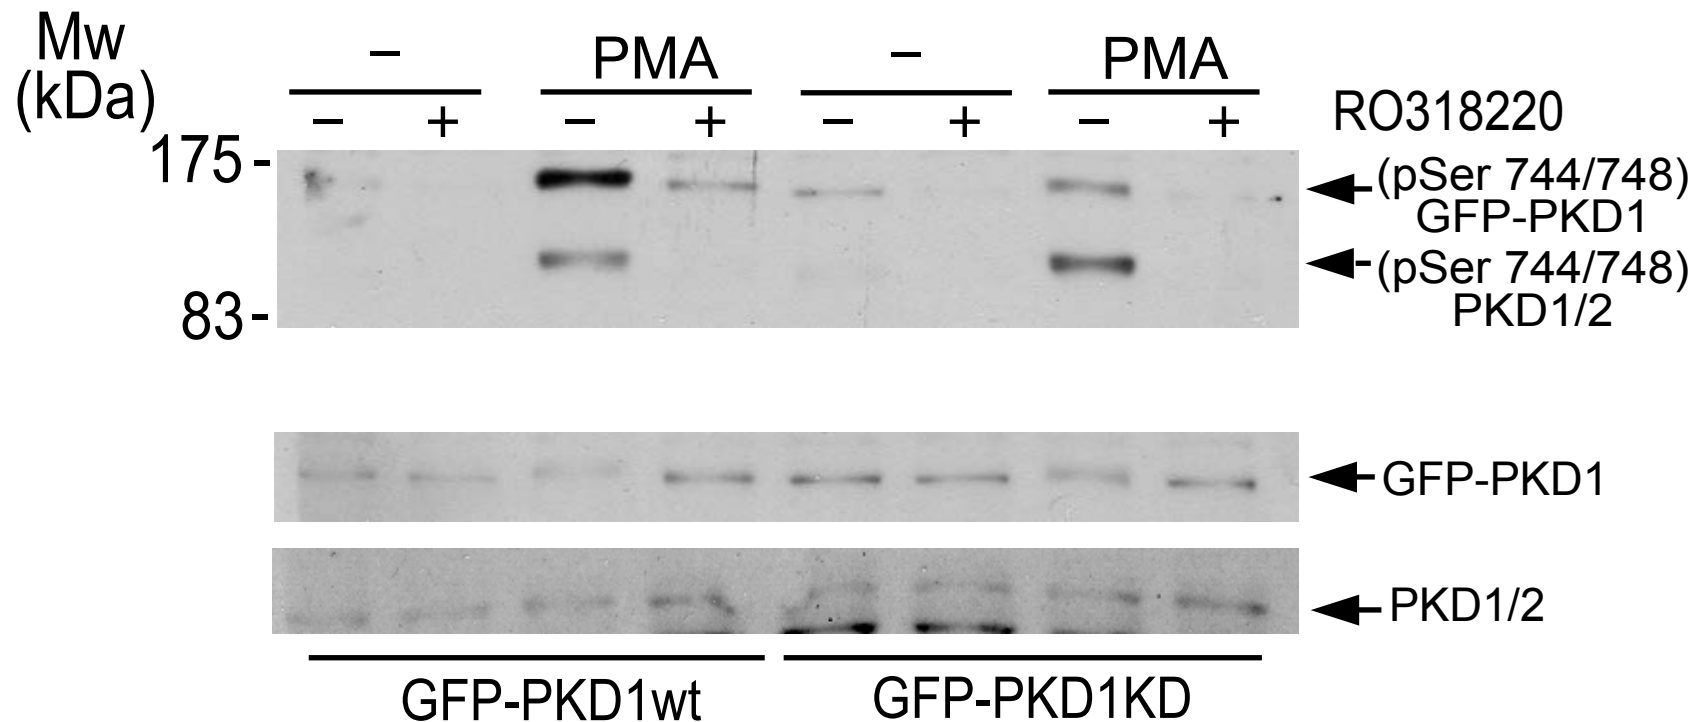**B**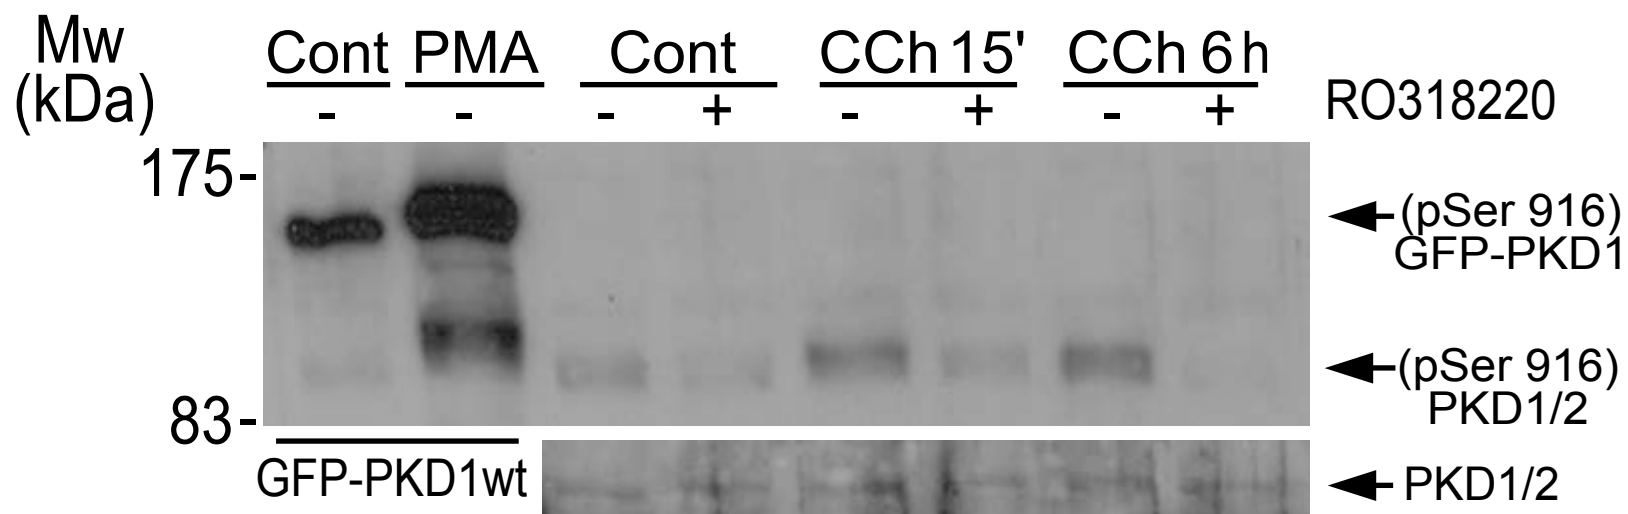

**A**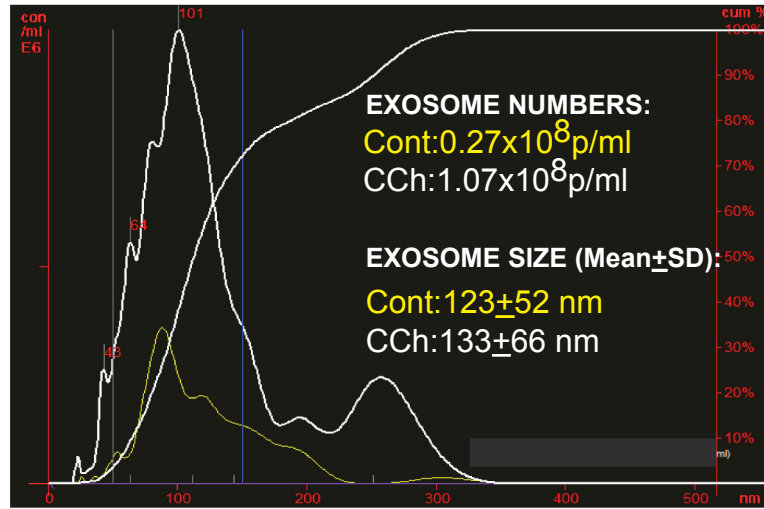**B**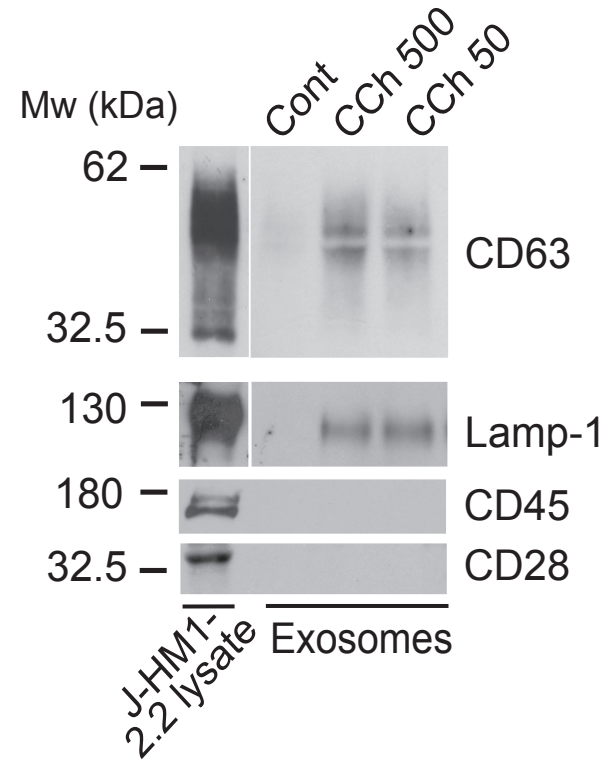**C**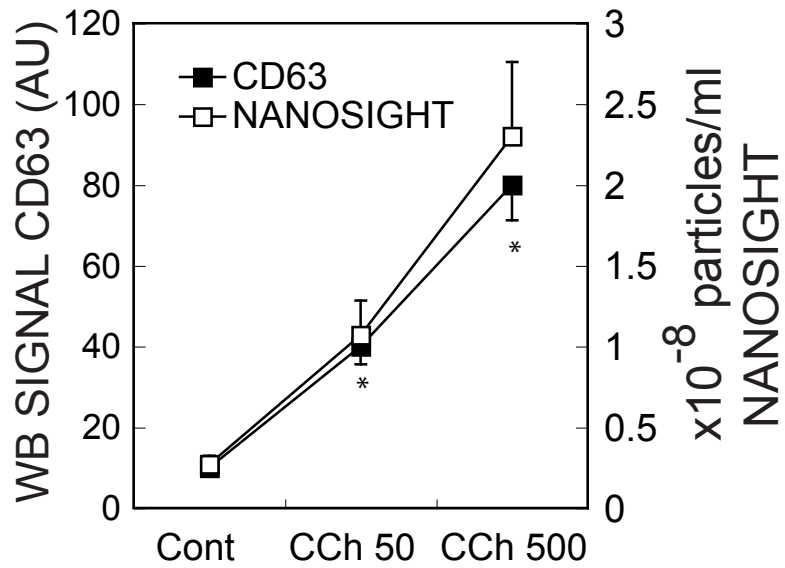**D**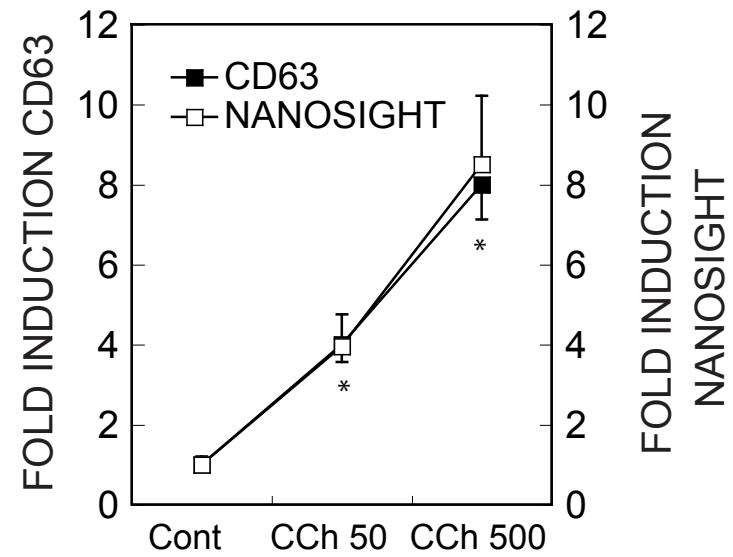

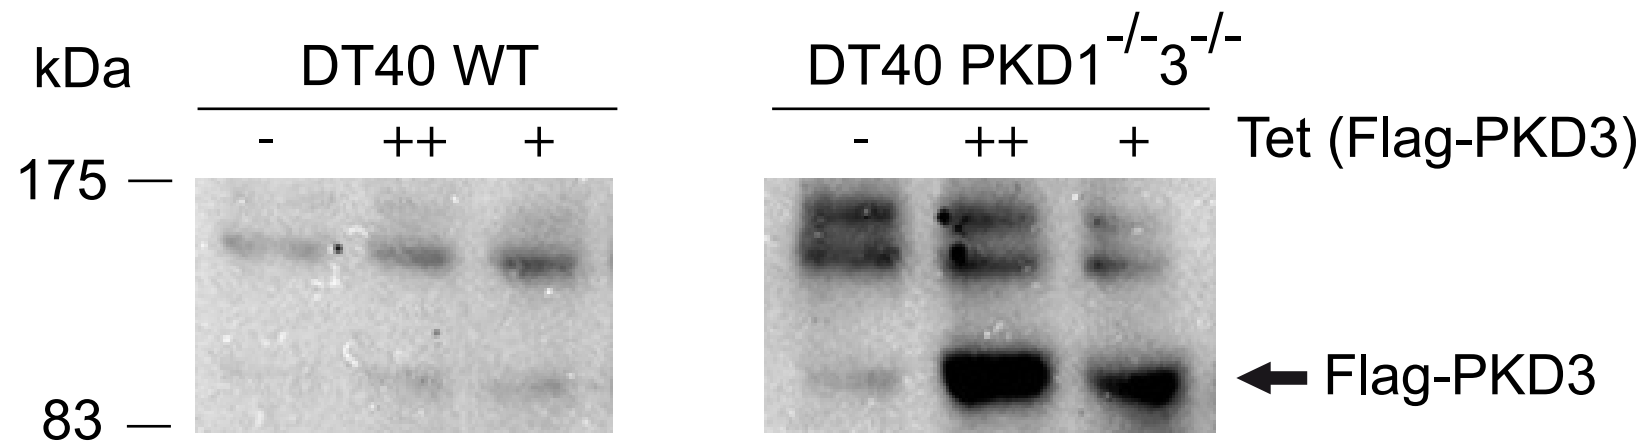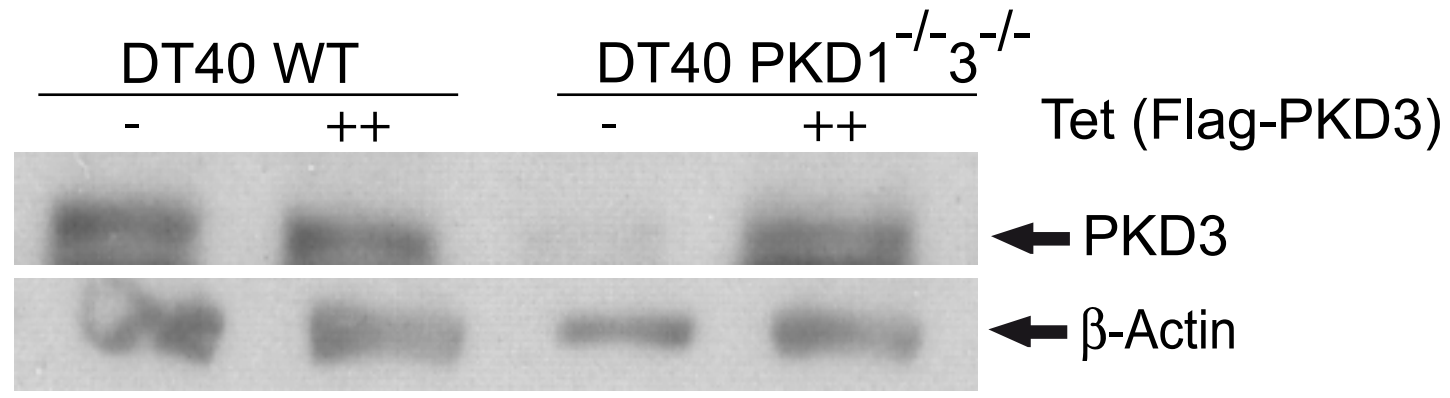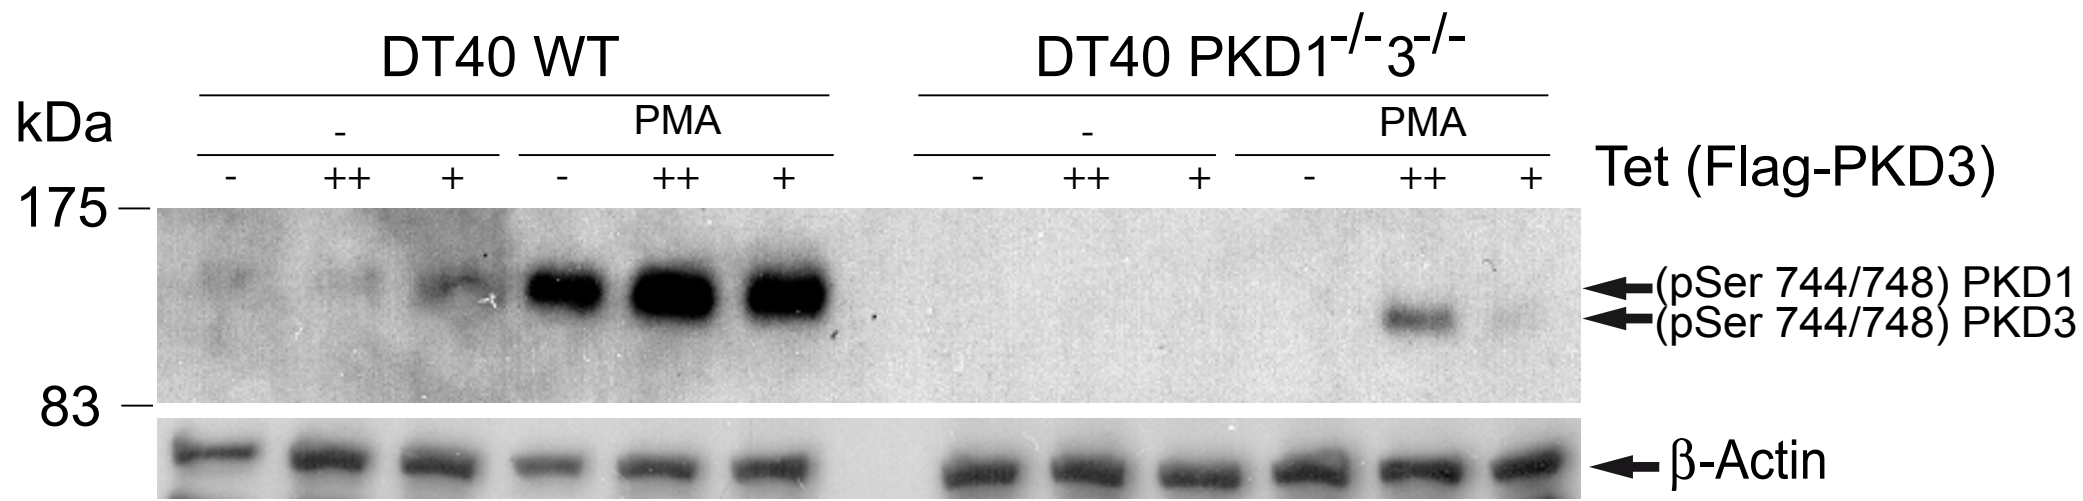

Supplemental figure S3 Mazzeo et al.

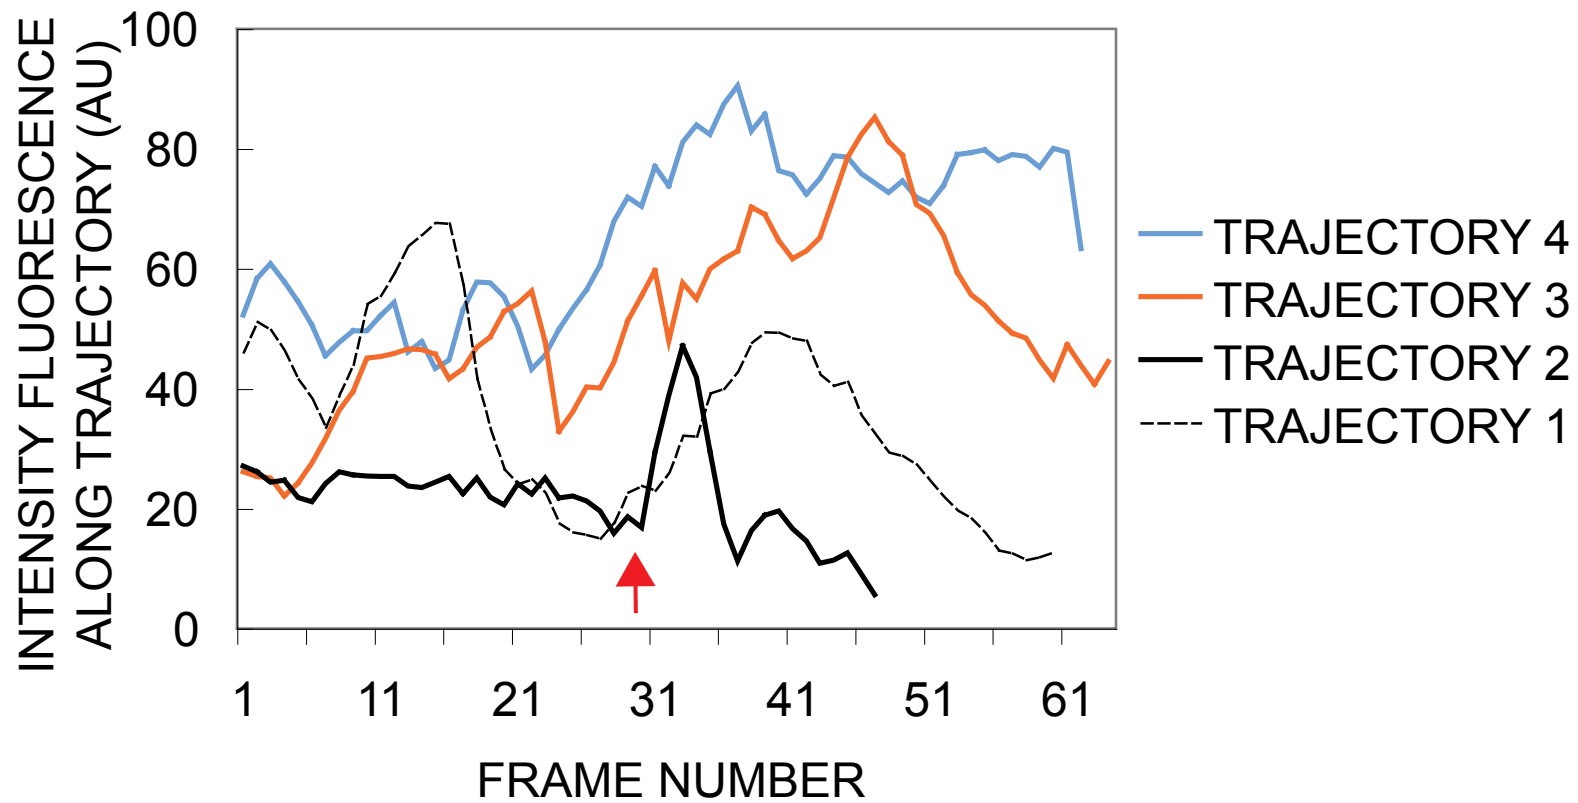

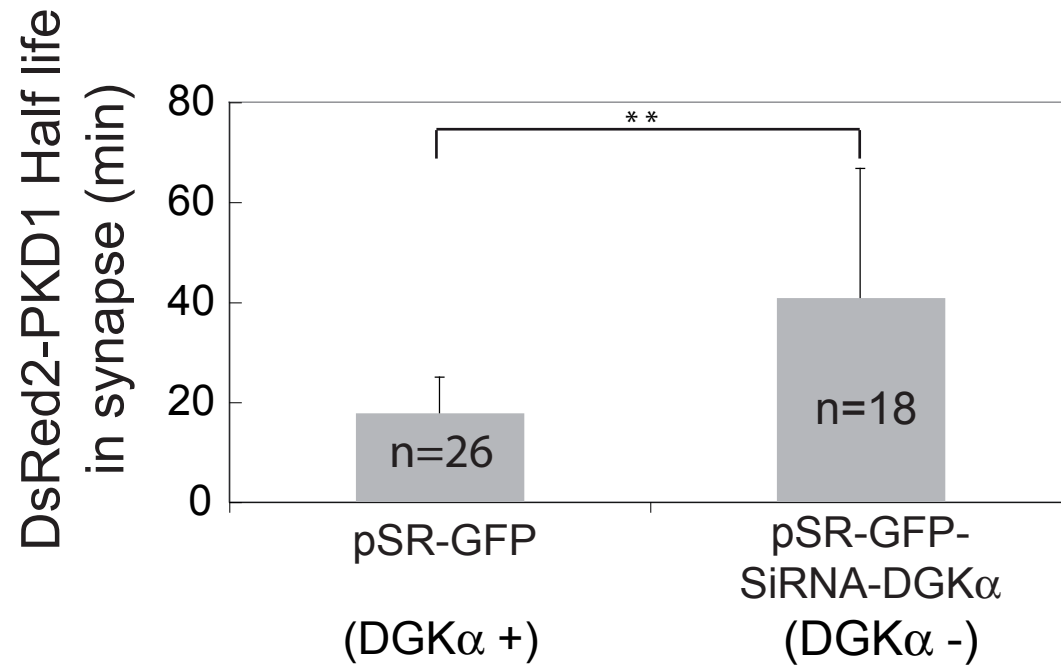

Supplemental Figure S5 Mazzeo et al
